# Supplementary material for: Interface engineering of a highly sensitive solution processed organic photodiode
Source: Royal Society of Chemistry journal article supplement (doi:10.1039/c4cp02301c), 2014-01-01
Supplement: c4cp02301c1.pdf [file c4cp02301c1.pdf]

## **Supporting Information**

# **Interface engineering for highly sensitive solution processed organic photodiode**

Yu Jin Kim<sup>†</sup>, Chan Eon Park<sup>\*†</sup> and Dae Sung Chung<sup>\*‡</sup>

<sup>†</sup> POSTECH Organic Electronics Laboratory, Department of Chemical Engineering, Pohang  
University of Science and Technology, Pohang, 790-784, Republic of Korea

<sup>‡</sup> School of Chemical Engineering and Material Science Chung-Ang University, Seoul, 156–  
756, Republic of Korea

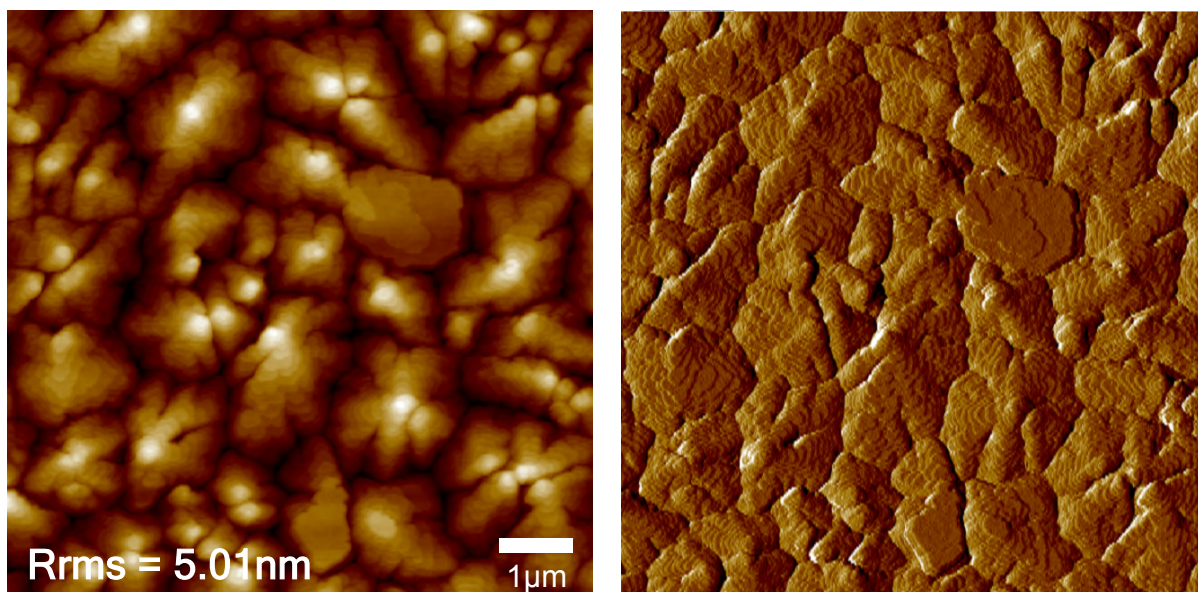

**Figure S1.** AFM height (left) and phase (right) image of Pentacene on the ITO-coated glass

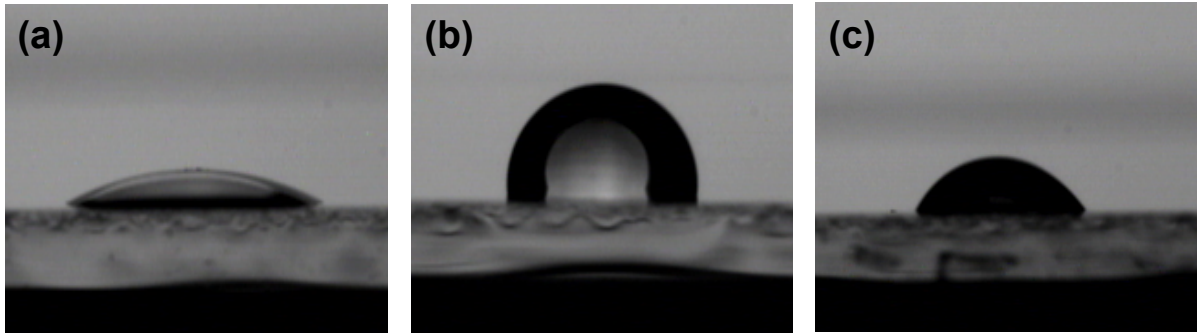

**Figure S2.** Photographs of water droplets on the different surface layers: (a) PEDOT:PSS, (b) Pentacene and (c) p-DTS(FBTTh<sub>2</sub>)<sub>2</sub>

**Table S1.** Surface energy of three different layers

|                                             | Contact angle (°) |               | $\gamma_s^p$ (mJ m <sup>-2</sup> ) <sup>a</sup> | $\gamma_s^d$ (mJ m <sup>-2</sup> ) <sup>b</sup> | $\gamma_s^c$ ( $\gamma_s^p + \gamma_s^d$ ) (mJ m <sup>-2</sup> ) |
|---------------------------------------------|-------------------|---------------|-------------------------------------------------|-------------------------------------------------|------------------------------------------------------------------|
|                                             | Water             | Diiodomethane |                                                 |                                                 |                                                                  |
| <b>PEDOT:PSS</b>                            | 28                | 25            | 34.01                                           | 32.29                                           | 66.30                                                            |
| <b>Pentacene</b>                            | 96                | 67            | 1.98                                            | 22.71                                           | 24.69                                                            |
| <b>p-DTS(FBTTh<sub>2</sub>)<sub>2</sub></b> | 64                | 52            | 16.04                                           | 25.02                                           | 41.24                                                            |

<sup>a</sup>  $\gamma_s^p$  : the polar component

<sup>b</sup>  $\gamma_s^d$  : the dispersion component

<sup>c</sup>  $\gamma_s$  : the surface energy

(The  $\gamma_s$  values were calculated according to the following equation by fitting to the measured values of the contact angles :

$$1 + \cos \theta = \frac{2(\gamma_s^d)^{1/2}(\gamma_{IV}^d)^{1/2}}{\gamma_{IV}} + \frac{2(\gamma_s^p)^{1/2}(\gamma_{IV}^p)^{1/2}}{\gamma_{IV}}$$
